# Supplementary material for: Consensus quality indicators for monitoring multiple sclerosis
Source: PubMed Central journal article supplement (PMC10998202; doi:10.1016/j.lanepe.2024.100891), 2024-03-29

# Supplement #3

## evaluation

# Results of evaluation: criterion 1

## Does the QI makes sense?

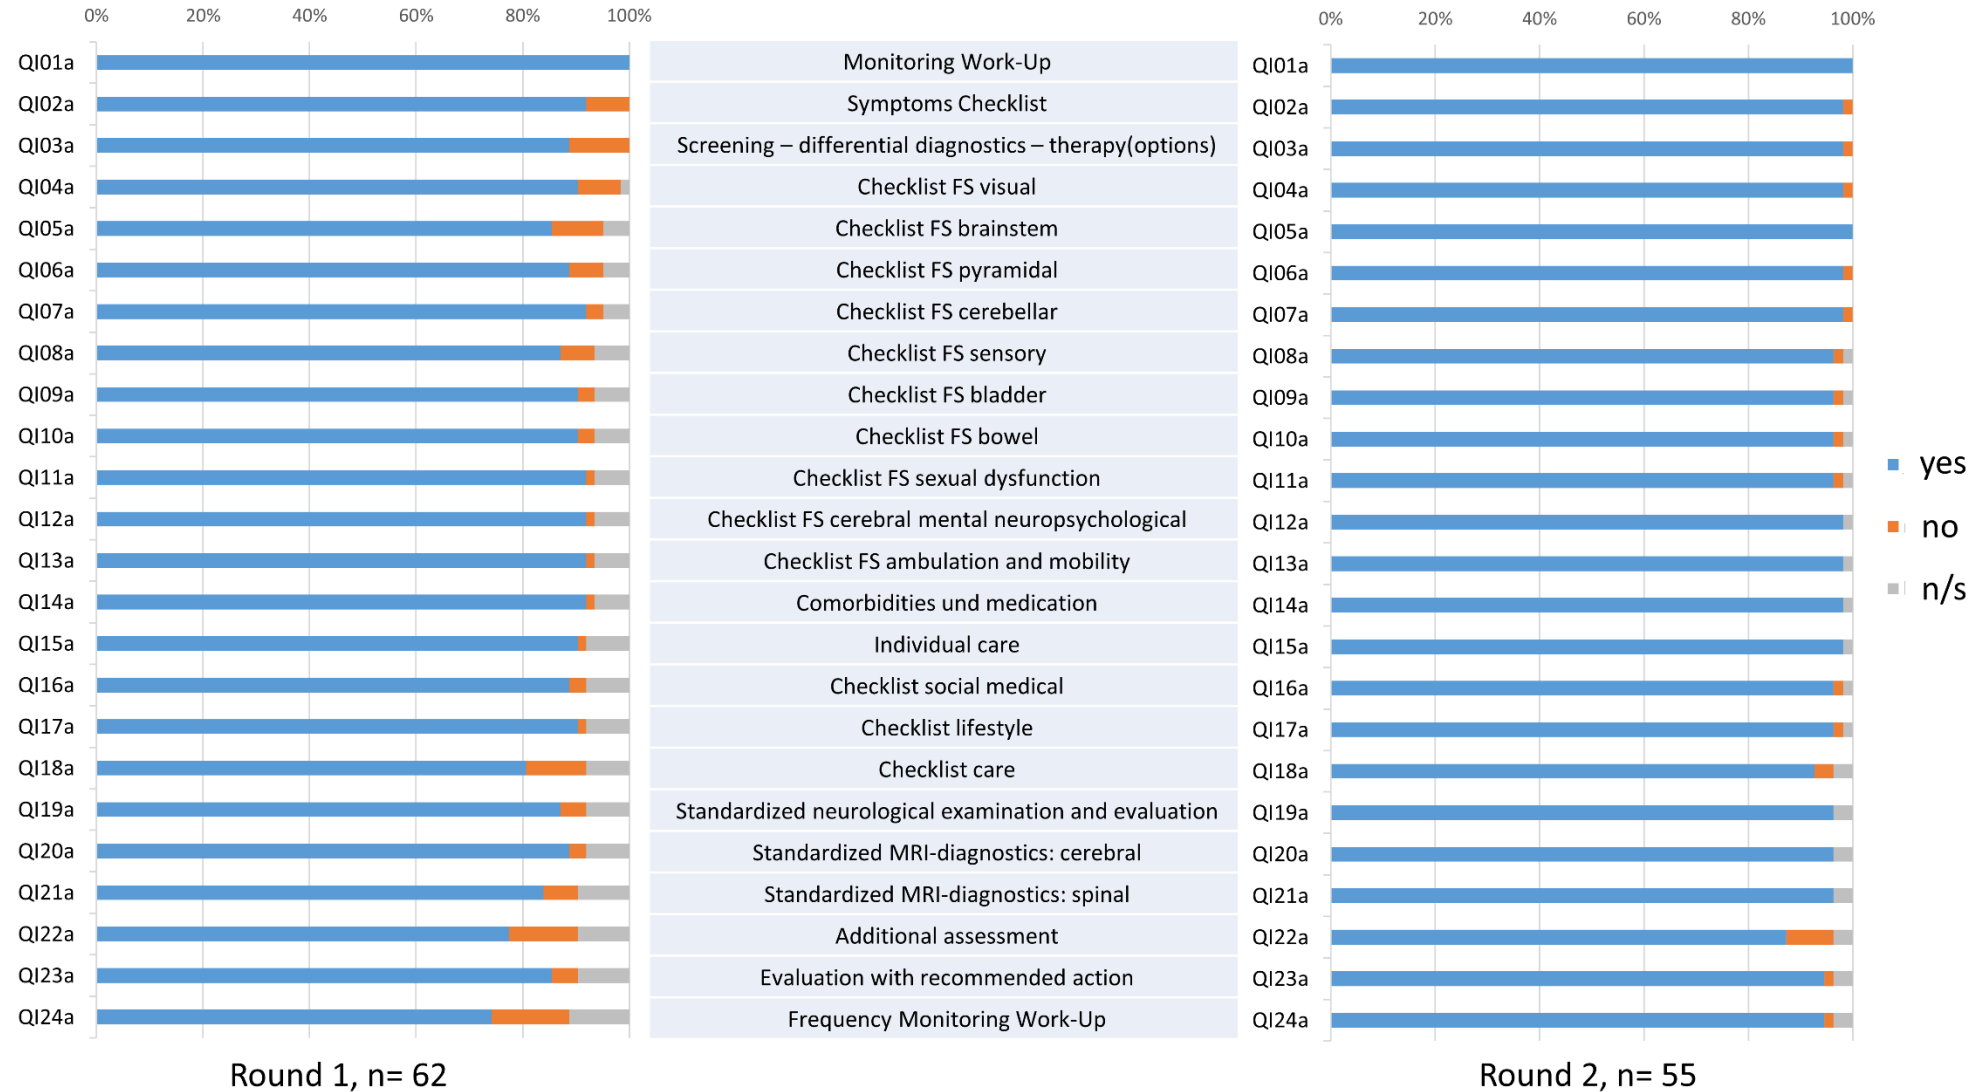

# Results of evaluation: criterion 2

## The QI is ... for MS care

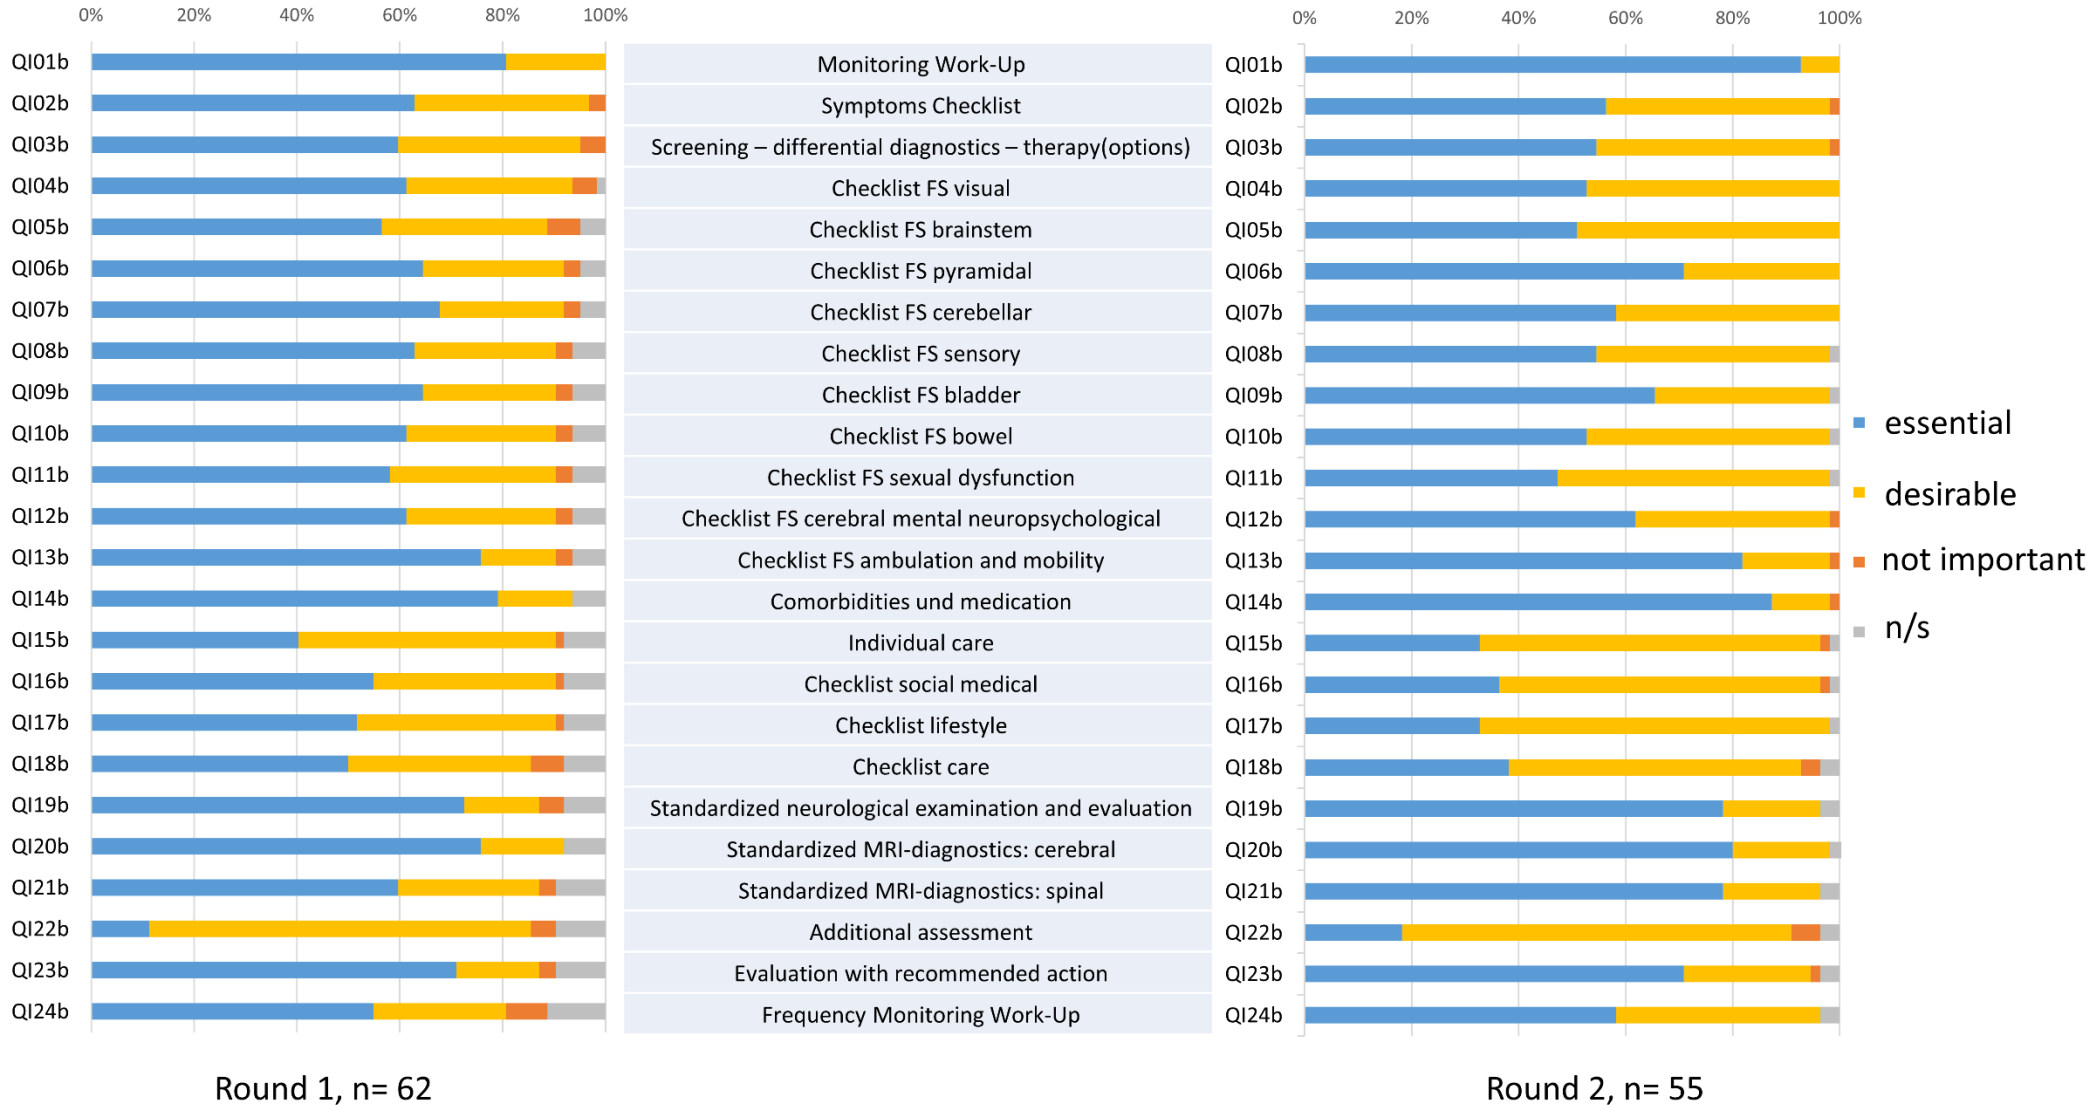

# Results of evaluation: criterion 3

## Should this QI be communicated to the patient?

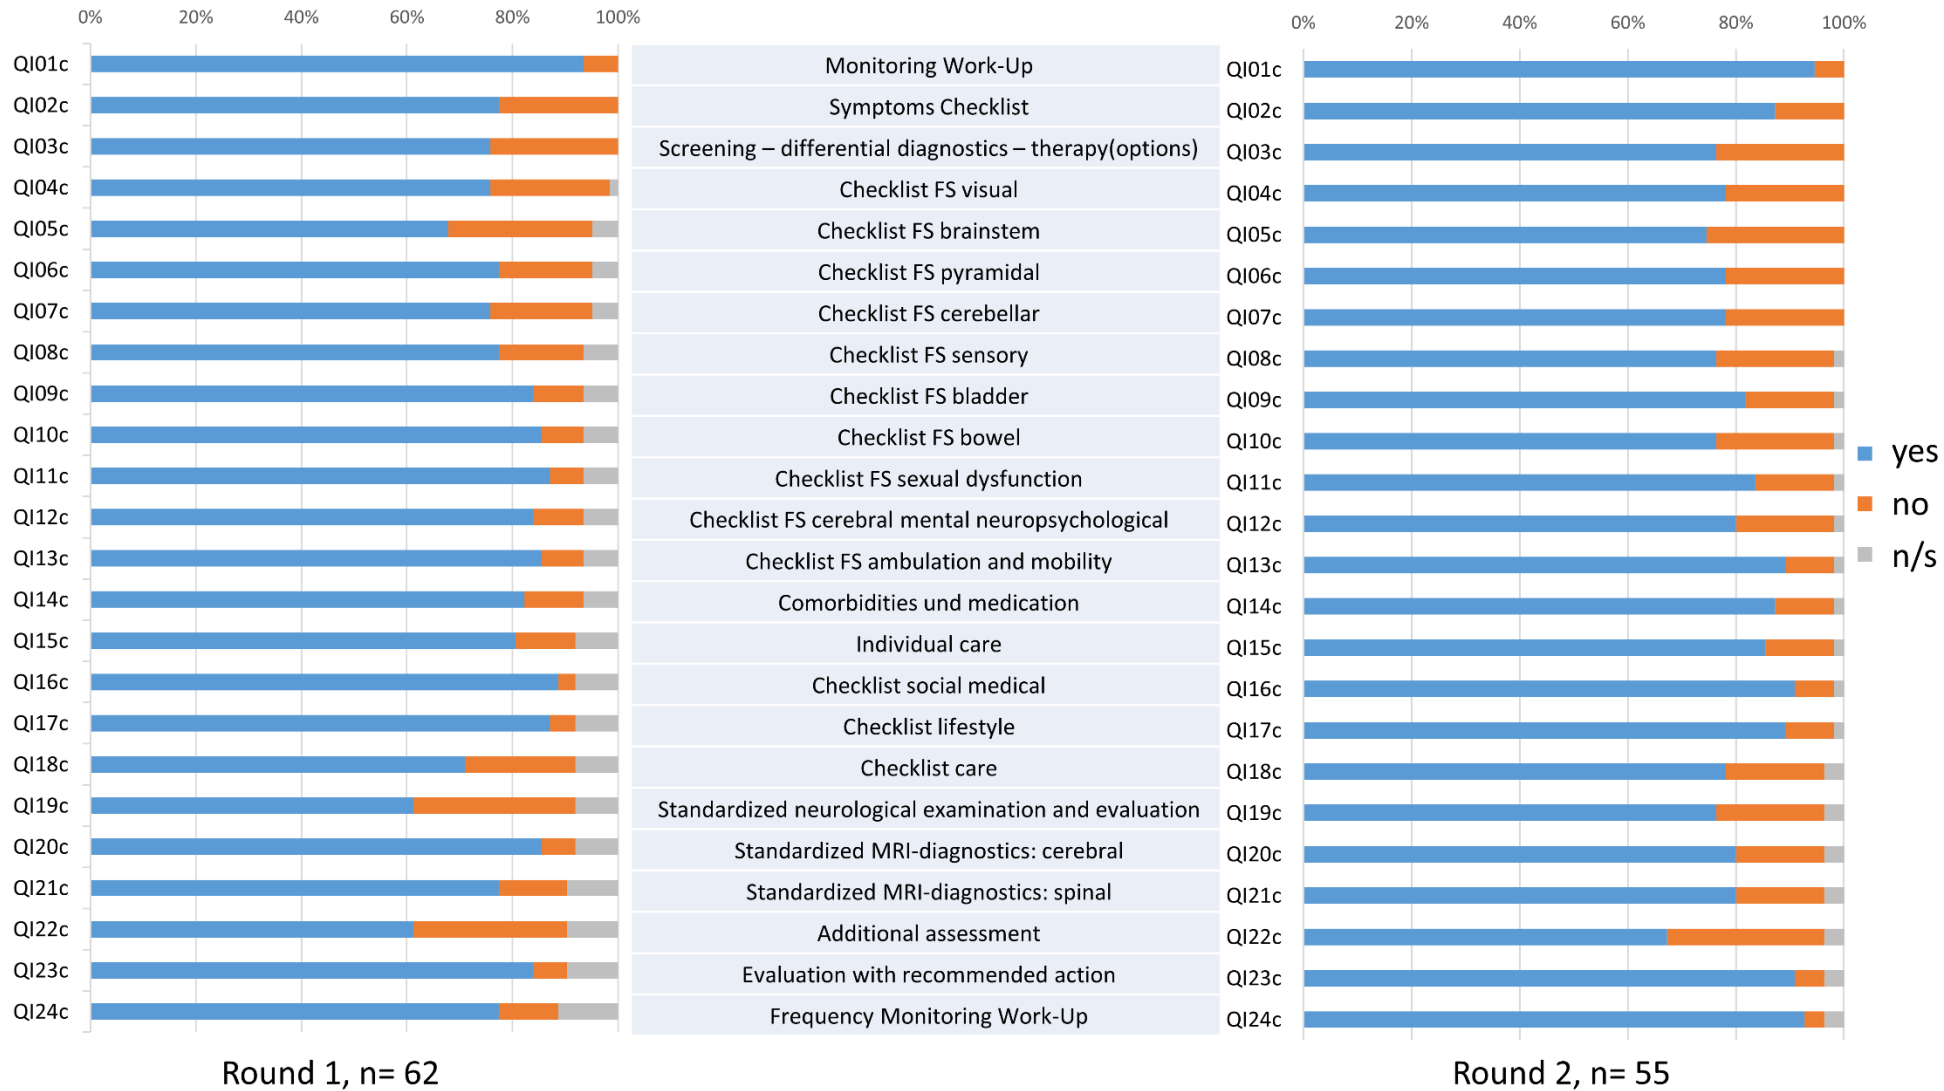

Supplement: mmc3.pdf [file mmc3.pdf]
